# Supplementary material
Source: HighWire-hosted journal article supplement (http://jpet.aspetjournals.org/highwire/filestream/152660/field_highwire_adjunct_files/0/1399_supp_data.pdf)
Supplement: 1399_supp_data.pdf [file 1399_supp_data.pdf]

Supplemental Information to:

The Anti-inflammatory Effects and Clinical Potential of Dexmedetomidine in Pulmonary  
Arterial Hypertension

Yohei Yamaguchi, Susumu Hosokawa, Go Haraguchi, Yusuke Kajikawa, Makito Sakurai,  
Taku Ishii, Noboru Ando, Tomohiro Morio, Shozaburo Doi, Tetsushi Furukawa

*Journal of Pharmacology and Experimental Therapeutics*

Manuscript number: JPET-AR-2022-001399R3

1. Supplemental Method

Heart rate of rats during catheterization study

Heart rate of the rats in each group was calculated from the RV pressure waveform  
collected during the catheterization studies.

2. Supplemental Figure

## Figure S1

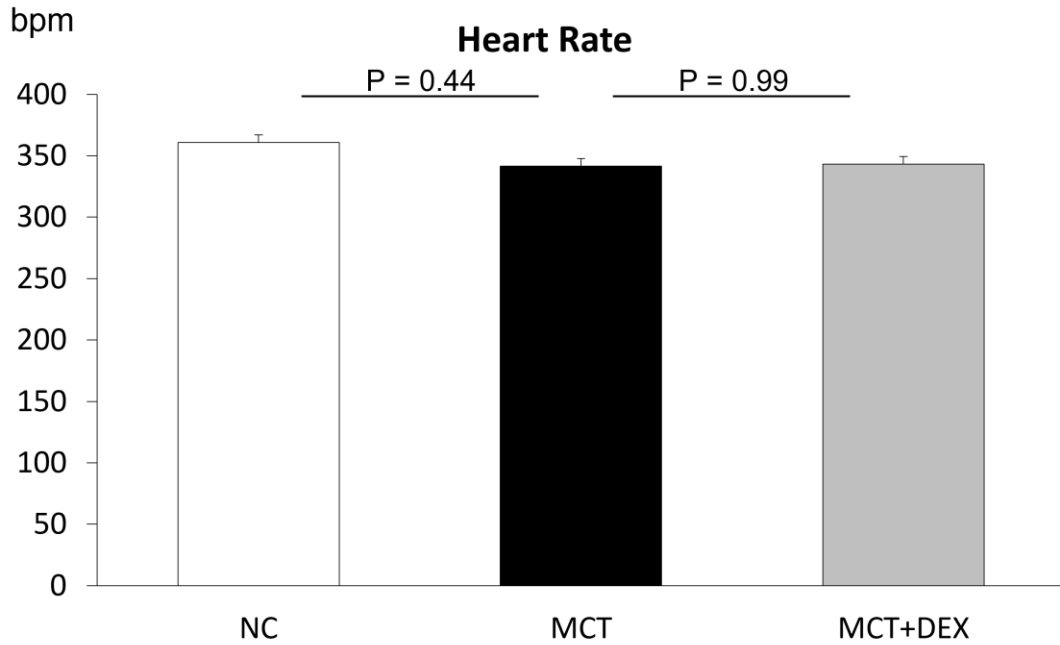

Figure S1. Heart rate of rats during catheterization study. NC; negative control; n=7,

MCT; n=6, MCT + DEX; n=7.
